# Supplementary material
Source: PubMed Central journal article supplement (PMC4093871)
Supplement: JVI.00097-14_zjv999099068so1.pdf [file JVI.00097-14_zjv999099068so1.pdf]

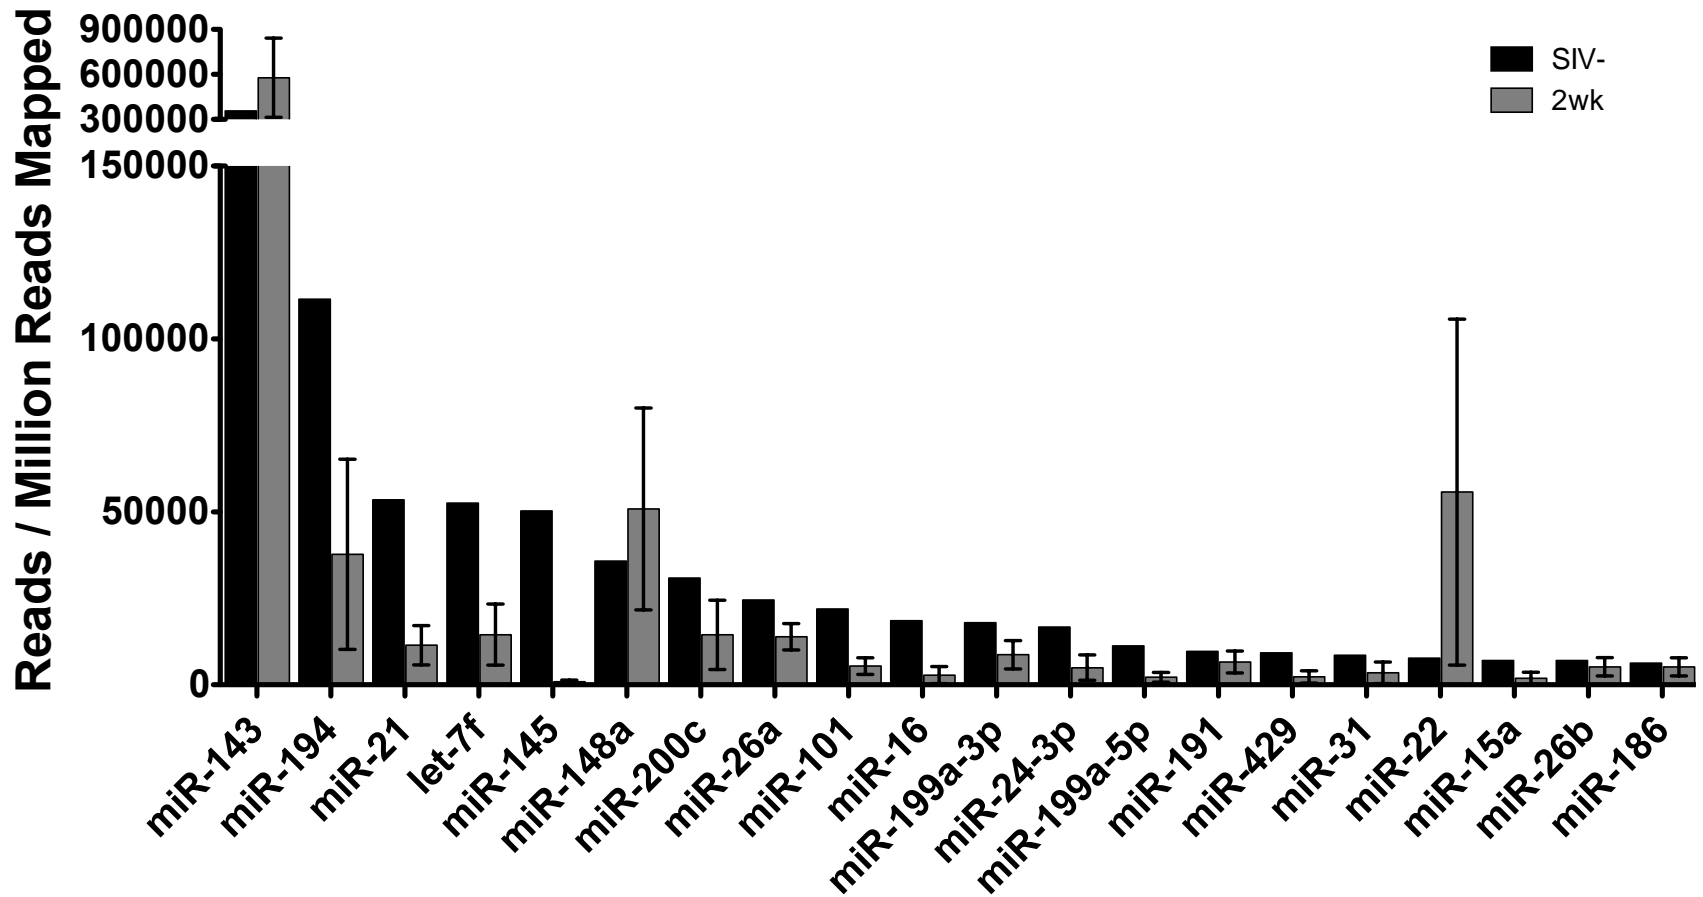

**Sup Fig 1. SIV induced miRNA disruption occurs early in viral infection.** Small RNA libraries were constructed and sequenced from the jejunums of SIVmac251 infected rhesus macaques in the primary stage of infection (2wks; grey bars) as well as from an SIV negative control (black bars) (A)
